# Supplementary material for: Influence of Incremental Short Term Salt Stress at the Seedling Stage on Root Plasticity, Shoot Thermal Profile and Ion Homeostasis in Contrasting Wheat Genotypes
Source: MDPI journal article supplement (doi:10.3390/agriculture13101946), 2023-10-06
Supplement: s1 [file s1]

**Table S1** Two-way ANOVA results of measured traits of wheat genotypes Kharchia 65 (K-65), B.T. Schomburgk (BTS), HD2687 and HD3298 grown under hydroponics in control or salt stress conditions (C: control, 5dSm<sup>-1</sup>, 10dSm<sup>-1</sup> and 15dSm<sup>-1</sup>). CT (Canopy temperature, °C), AD (Average diameter of root, µm), R Na<sup>+</sup> (Root Na<sup>+</sup> content, %), L Na<sup>+</sup> (Leaf Na<sup>+</sup>, %), L Na<sup>+</sup>/K<sup>+</sup> (Leaf Na<sup>+</sup>/K<sup>+</sup>, %), R Na<sup>+</sup>/K<sup>+</sup> (Root Na<sup>+</sup>/K<sup>+</sup>, %), WD (Water deficit, %), TSRW\_LB (Total specific root weight length basis), TSRW\_SA (Total specific root weight surface area basis), STD (Stomatal density), RFW (Root fresh weight, g), CCM (Chlorophyll Content meter (Chlorophyll content index), RDW (Root dry weight, g), TFW (Total fresh weight, g), TDW (Total dry weight, g), SDW (Shoot dry weight, g), SFW (Shoot fresh weight, g), MSI (Membrane stability index, %), PH (Plant height, cm), RL (Root length, cm), SL (Shoot length, cm), R\_K<sup>+</sup> (Root K<sup>+</sup> content, %), RWC (Relative water content, %), TRL (Total root length), TIPS (Total root tips), FORKS (Total root forks), TPA (Total projected area), TSA (Total surface area), TRV (Total root volume), L\_K<sup>+</sup> (Leaf K<sup>+</sup> content), TSRL (Total specific root length), TSRSA (Total specific root surface area). . \*, \*\* and \*\*\* indicate 5%, 1% and 0.1% levels of significance, respectively.

| <b>Trait: PH</b>     |    |         |         |          |           |              |
|----------------------|----|---------|---------|----------|-----------|--------------|
| Particulars          | Df | Sum Sq  | Mean Sq | F value  | Pr(>F)    | Significance |
| Treatment            | 3  | 10710.3 | 3570.1  | 4705.837 | < 2.2e-16 | ***          |
| Genotype             | 3  | 285.1   | 95      | 125.2715 | < 2.2e-16 | ***          |
| Treatment : Genotype | 9  | 234.7   | 26.1    | 34.3695  | 2.12E-13  | ***          |

| <b>Response: AD</b>  |    |          |          |         |          |              |
|----------------------|----|----------|----------|---------|----------|--------------|
| Particulars          | Df | Sum Sq   | Mean Sq  | F value | Pr(>F)   | Significance |
| Treatment            | 3  | 0.065425 | 0.021809 | 18.7162 | 4.94E-07 | ***          |
| Genotype             | 3  | 0.028555 | 0.009518 | 8.1687  | 0.000401 | ***          |
| Treatment : Genotype | 9  | 0.029906 | 0.003323 | 2.8517  | 0.014866 | *            |

| <b>Response: APX_ROOT</b> |    |          |         |         |        |              |
|---------------------------|----|----------|---------|---------|--------|--------------|
| Particulars               | Df | Sum Sq   | Mean Sq | F value | Pr(>F) | Significance |
| Treatment                 | 3  | 4592313  | 1530771 | 1.7868  | 0.1709 |              |
| Genotype                  | 3  | 3113001  | 1037667 | 1.2112  | 0.3226 |              |
| Treatment : Genotype      | 9  | 11052941 | 1228105 | 1.4335  | 0.2183 |              |

| <b>Response: APX_SHOOT</b> |    |          |          |         |          |              |
|----------------------------|----|----------|----------|---------|----------|--------------|
| Particulars                | Df | Sum Sq   | Mean Sq  | F value | Pr(>F)   | Significance |
| Treatment                  | 3  | 2.09E+08 | 69670748 | 10.318  | 7.91E-05 | ***          |
| Genotype                   | 3  | 40996695 | 13665565 | 2.0238  | 0.1317   |              |
| Treatment : Genotype       | 9  | 85431473 | 9492386  | 1.4058  | 0.2297   |              |

| Response: CAT_ROOT   |    |         |         |         |                     |              |
|----------------------|----|---------|---------|---------|---------------------|--------------|
| Particulars          | Df | Sum Sq  | Mean Sq | F value | Pr(>F)              | Significance |
| Treatment            | 3  | 2054.2  | 684.7   | 14.579  | <b>3.70E-06</b>     | ***          |
| Genotype             | 3  | 16579.3 | 5526.4  | 117.667 | <b>&lt; 2.2e-16</b> | ***          |
| Treatment : Genotype | 9  | 16110.5 | 1790.1  | 38.113  | <b>1.31E-14</b>     | ***          |

| Response: CAT_SHOOT  |    |           |          |         |                  |              |
|----------------------|----|-----------|----------|---------|------------------|--------------|
| Particulars          | Df | Sum Sq    | Mean Sq  | F value | Pr(>F)           | Significance |
| Treatment            | 3  | 101128194 | 33709398 | 81.734  | <b>1.55E-14</b>  | ***          |
| Genotype             | 3  | 18396114  | 6132038  | 14.8681 | <b>4.11E-06</b>  | ***          |
| Treatment : Genotype | 9  | 21127697  | 2347522  | 5.692   | <b>0.0001343</b> | ***          |

| Response: CCI        |    |        |         |         |                 |              |
|----------------------|----|--------|---------|---------|-----------------|--------------|
| Particulars          | Df | Sum Sq | Mean Sq | F value | Pr(>F)          | Significance |
| Treatment            | 3  | 0.224  | 0.07465 | 0.3955  | <b>0.757127</b> |              |
| Genotype             | 3  | 2.8156 | 0.93854 | 4.9728  | <b>0.006418</b> | **           |
| Treatment : Genotype | 9  | 0.8502 | 0.09447 | 0.5005  | <b>0.862278</b> |              |

| Response: CT         |    |        |         |         |                     |              |
|----------------------|----|--------|---------|---------|---------------------|--------------|
| Particulars          | Df | Sum Sq | Mean Sq | F value | Pr(>F)              | Significance |
| Treatment            | 3  | 20.513 | 6.8377  | 29.7524 | <b>1.09E-13</b>     | ***          |
| Genotype             | 3  | 49.19  | 16.3965 | 71.3447 | <b>&lt; 2.2e-16</b> | ***          |
| Treatment : Genotype | 9  | 5.125  | 0.5695  | 2.4779  | <b>0.01374</b>      | *            |

| Response: DAB_LEAF   |    |        |         |         |                 |              |
|----------------------|----|--------|---------|---------|-----------------|--------------|
| Particulars          | Df | Sum Sq | Mean Sq | F value | Pr(>F)          | Significance |
| Treatment            | 3  | 2003.5 | 667.84  | 12.4473 | <b>1.85E-05</b> | ***          |
| Genotype             | 3  | 1641.4 | 547.12  | 10.1973 | <b>8.63E-05</b> | ***          |
| Treatment : Genotype | 9  | 3618.8 | 402.09  | 7.4942  | <b>1.17E-05</b> | ***          |

| Response: DAB_ROOT   |    |        |         |         |                |              |
|----------------------|----|--------|---------|---------|----------------|--------------|
| Particulars          | Df | Sum Sq | Mean Sq | F value | Pr(>F)         | Significance |
| Treatment            | 3  | 413.8  | 137.93  | 0.5681  | <b>0.64035</b> |              |
| Genotype             | 3  | 1997.7 | 665.89  | 2.7424  | <b>0.06052</b> | .            |
| Treatment : Genotype | 9  | 2038.4 | 226.48  | 0.9328  | <b>0.51175</b> |              |

| Response: FORKS      |    |          |          |         |                 |              |
|----------------------|----|----------|----------|---------|-----------------|--------------|
| Particulars          | Df | Sum Sq   | Mean Sq  | F value | Pr(>F)          | Significance |
| Treatment            | 3  | 3.35E+08 | 1.12E+08 | 22.2503 | <b>8.88E-08</b> | ***          |
| Genotype             | 3  | 8462081  | 2820694  | 0.5613  | <b>0.64474</b>  |              |
| Treatment : Genotype | 9  | 89773874 | 9974875  | 1.9848  | <b>0.077108</b> | .            |

| Response: GR_ROOT    |    |         |         |         |                 |              |
|----------------------|----|---------|---------|---------|-----------------|--------------|
| Particulars          | Df | Sum Sq  | Mean Sq | F value | Pr(>F)          | Significance |
| Treatment            | 3  | 65.47   | 21.8233 | 5.605   | <b>0.003567</b> | **           |
| Genotype             | 3  | 87.839  | 29.2797 | 7.52    | <b>0.000679</b> | ***          |
| Treatment : Genotype | 9  | 167.539 | 18.6154 | 4.7811  | <b>0.000536</b> | ***          |

| Response: GR_SHOOT   |    |        |         |         |                 |              |
|----------------------|----|--------|---------|---------|-----------------|--------------|
| Particulars          | Df | Sum Sq | Mean Sq | F value | Pr(>F)          | Significance |
| Treatment            | 3  | 174421 | 58140   | 39.2161 | <b>1.67E-10</b> | ***          |
| Genotype             | 3  | 143303 | 47768   | 32.2196 | <b>1.64E-09</b> | ***          |
| Treatment : Genotype | 9  | 84499  | 9389    | 6.3328  | <b>5.41E-05</b> | ***          |

| Response: Leaf K <sup>+</sup> |    |          |          |          |                     |              |
|-------------------------------|----|----------|----------|----------|---------------------|--------------|
| Particulars                   | Df | Sum Sq   | Mean Sq  | F value  | Pr(>F)              | Significance |
| Treatment                     | 3  | 0.112898 | 0.037633 | 1461.005 | <b>&lt; 2.2e-16</b> | ***          |
| Genotype                      | 3  | 0.25216  | 0.084053 | 3263.178 | <b>&lt; 2.2e-16</b> | ***          |
| Treatment : Genotype          | 9  | 0.003181 | 0.000353 | 13.7226  | <b>2.08E-08</b>     | ***          |

| Response: Leaf Na <sup>+</sup> |    |         |         |          |        |              |
|--------------------------------|----|---------|---------|----------|--------|--------------|
| Particulars                    | Df | Sum Sq  | Mean Sq | F value  | Pr(>F) | Significance |
| Treatment                      | 3  | 1.58771 | 0.52924 | 9752.283 | <2e-16 | ***          |
| Genotype                       | 3  | 0.56085 | 0.18695 | 3444.95  | <2e-16 | ***          |
| Treatment : Genotype           | 9  | 0.24996 | 0.02777 | 511.7916 | <2e-16 | ***          |

| Response: Leaf Na <sup>+</sup> /K <sup>+</sup> |    |         |         |            |        |              |
|------------------------------------------------|----|---------|---------|------------|--------|--------------|
| Particulars                                    | Df | Sum Sq  | Mean Sq | F value    | Pr(>F) | Significance |
| Treatment                                      | 3  | 231.71  | 77.237  | 12350.7814 | <2e-16 | ***          |
| Genotype                                       | 3  | 192.011 | 64.004  | 10234.7482 | <2e-16 | ***          |
| Treatment : Genotype                           | 9  | 158.129 | 17.57   | 2809.5667  | <2e-16 | ***          |

| Response: TBARS ROOT |    |          |          |         |          |              |
|----------------------|----|----------|----------|---------|----------|--------------|
| Particulars          | Df | Sum Sq   | Mean Sq  | F value | Pr(>F)   | Significance |
| Treatment            | 3  | 0.002393 | 0.000798 | 55.4685 | 2.38E-12 | ***          |
| Genotype             | 3  | 0.001189 | 0.000396 | 27.5565 | 9.30E-09 | ***          |
| Treatment : Genotype | 9  | 0.000967 | 0.000107 | 7.4741  | 1.20E-05 | ***          |

| Response: TBARS SHOOT |    |         |          |         |          |              |
|-----------------------|----|---------|----------|---------|----------|--------------|
| Particulars           | Df | Sum Sq  | Mean Sq  | F value | Pr(>F)   | Significance |
| Treatment             | 3  | 0.37109 | 0.123696 | 90.9427 | 3.71E-15 | ***          |
| Genotype              | 3  | 0.13409 | 0.044696 | 32.8611 | 1.31E-09 | ***          |
| Treatment : Genotype  | 9  | 0.10523 | 0.011692 | 8.596   | 3.12E-06 | ***          |

| Response: MSI        |    |        |         |          |           |              |
|----------------------|----|--------|---------|----------|-----------|--------------|
| Particulars          | Df | Sum Sq | Mean Sq | F value  | Pr(>F)    | Significance |
| Treatment            | 3  | 333.6  | 111.2   | 418.0185 | < 2.2e-16 | ***          |
| Genotype             | 3  | 56.68  | 18.894  | 71.0259  | 9.89E-14  | ***          |
| Treatment : Genotype | 9  | 240.61 | 26.735  | 100.4996 | < 2.2e-16 | ***          |

| Response: NBT leaf   |    |        |         |         |                 |              |
|----------------------|----|--------|---------|---------|-----------------|--------------|
| Particulars          | Df | Sum Sq | Mean Sq | F value | Pr(>F)          | Significance |
| Treatment            | 3  | 6143.9 | 2047.96 | 9.2395  | <b>0.000175</b> | ***          |
| Genotype             | 3  | 406.6  | 135.54  | 0.6115  | <b>0.612812</b> |              |
| Treatment : Genotype | 9  | 8397   | 933     | 4.2092  | <b>0.001354</b> | **           |

| Response: NBT root   |    |        |         |         |                 |              |
|----------------------|----|--------|---------|---------|-----------------|--------------|
| Particulars          | Df | Sum Sq | Mean Sq | F value | Pr(>F)          | Significance |
| Treatment            | 3  | 2071.5 | 690.49  | 4.0795  | <b>0.015258</b> | *            |
| Genotype             | 3  | 1848.6 | 616.21  | 3.6407  | <b>0.023726</b> | *            |
| Treatment : Genotype | 9  | 7319.4 | 813.27  | 4.8049  | <b>0.000516</b> | ***          |

| Response: Root K <sup>+</sup> |    |         |         |           |                  |              |
|-------------------------------|----|---------|---------|-----------|------------------|--------------|
| Particulars                   | Df | Sum Sq  | Mean Sq | F value   | Pr(>F)           | Significance |
| Treatment                     | 3  | 0.9858  | 0.3286  | 1906.2755 | <b>&lt;2e-16</b> | ***          |
| Genotype                      | 3  | 0.1781  | 0.05937 | 344.4023  | <b>&lt;2e-16</b> | ***          |
| Treatment : Genotype          | 9  | 0.19239 | 0.02138 | 124.0099  | <b>&lt;2e-16</b> | ***          |

| Response: Root Na <sup>+</sup> |    |        |         |          |                  |              |
|--------------------------------|----|--------|---------|----------|------------------|--------------|
| Particulars                    | Df | Sum Sq | Mean Sq | F value  | Pr(>F)           | Significance |
| Treatment                      | 3  | 4.1801 | 1.39336 | 11156.92 | <b>&lt;2e-16</b> | ***          |
| Genotype                       | 3  | 1.1221 | 0.37402 | 2994.832 | <b>&lt;2e-16</b> | ***          |
| Treatment : Genotype           | 9  | 0.625  | 0.06944 | 556.0408 | <b>&lt;2e-16</b> | ***          |

| Response: Root Na <sup>+</sup> /K <sup>+</sup> |    |        |         |          |                  |              |
|------------------------------------------------|----|--------|---------|----------|------------------|--------------|
| Particulars                                    | Df | Sum Sq | Mean Sq | F value  | Pr(>F)           | Significance |
| Treatment                                      | 3  | 86.197 | 28.7322 | 6499.056 | <b>&lt;2e-16</b> | ***          |
| Genotype                                       | 3  | 27.469 | 9.1562  | 2071.092 | <b>&lt;2e-16</b> | ***          |
| Treatment : Genotype                           | 9  | 38.954 | 4.3282  | 979.0155 | <b>&lt;2e-16</b> | ***          |

| Response: RDW        |    |          |          |         |                 |              |
|----------------------|----|----------|----------|---------|-----------------|--------------|
| Particulars          | Df | Sum Sq   | Mean Sq  | F value | Pr(>F)          | Significance |
| Treatment            | 3  | 0.009548 | 0.003183 | 71.6807 | <b>8.77E-14</b> | ***          |
| Genotype             | 3  | 0.002899 | 0.000966 | 21.7611 | <b>1.11E-07</b> | ***          |
| Treatment : Genotype | 9  | 0.004004 | 0.000445 | 10.021  | <b>6.53E-07</b> | ***          |

| Response: RFW        |    |         |         |          |                     |              |
|----------------------|----|---------|---------|----------|---------------------|--------------|
| Particulars          | Df | Sum Sq  | Mean Sq | F value  | Pr(>F)              | Significance |
| Treatment            | 3  | 1.32274 | 0.44091 | 120.5641 | <b>&lt; 2.2e-16</b> | ***          |
| Genotype             | 3  | 0.7686  | 0.2562  | 70.0562  | <b>1.18E-13</b>     | ***          |
| Treatment : Genotype | 9  | 0.93352 | 0.10372 | 28.3625  | <b>2.70E-12</b>     | ***          |

| Response: RL         |    |        |         |          |                     |              |
|----------------------|----|--------|---------|----------|---------------------|--------------|
| Particulars          | Df | Sum Sq | Mean Sq | F value  | Pr(>F)              | Significance |
| Treatment            | 3  | 3398.9 | 1132.95 | 2131.656 | <b>&lt; 2.2e-16</b> | ***          |
| Genotype             | 3  | 150.7  | 50.24   | 94.5324  | <b>2.20E-15</b>     | ***          |
| Treatment : Genotype | 9  | 193.6  | 21.51   | 40.4728  | <b>2.34E-14</b>     | ***          |

| Response: RWC        |    |        |         |         |                |              |
|----------------------|----|--------|---------|---------|----------------|--------------|
| Particulars          | Df | Sum Sq | Mean Sq | F value | Pr(>F)         | Significance |
| Treatment            | 3  | 407.49 | 135.829 | 3.7325  | <b>0.02161</b> | *            |
| Genotype             | 3  | 77.24  | 25.748  | 0.7075  | <b>0.55508</b> |              |
| Treatment : Genotype | 9  | 458.7  | 50.966  | 1.4005  | <b>0.23188</b> |              |

| Response: SDW        |    |         |          |          |                     |              |
|----------------------|----|---------|----------|----------|---------------------|--------------|
| Particulars          | Df | Sum Sq  | Mean Sq  | F value  | Pr(>F)              | Significance |
| Treatment            | 3  | 0.89262 | 0.29754  | 146.2462 | <b>&lt; 2.2e-16</b> | ***          |
| Genotype             | 3  | 0.26105 | 0.087016 | 42.7699  | <b>5.93E-11</b>     | ***          |
| Treatment : Genotype | 9  | 0.11262 | 0.012513 | 6.1503   | <b>6.97E-05</b>     | ***          |

| <b>Response: SFW</b>        |           |               |                |                |                     |                     |
|-----------------------------|-----------|---------------|----------------|----------------|---------------------|---------------------|
| <b>Particulars</b>          | <b>Df</b> | <b>Sum Sq</b> | <b>Mean Sq</b> | <b>F value</b> | <b>Pr(&gt;F)</b>    | <b>Significance</b> |
| <b>Treatment</b>            | 3         | 22.7476       | 7.5825         | 579.2888       | <b>&lt; 2.2e-16</b> | ***                 |
| <b>Genotype</b>             | 3         | 3.7548        | 1.2516         | 95.619         | <b>1.88E-15</b>     | ***                 |
| <b>Treatment : Genotype</b> | 9         | 1.0631        | 0.1181         | 9.0245         | <b>1.92E-06</b>     | ***                 |

| <b>Response: SL</b>         |           |               |                |                |                     |                     |
|-----------------------------|-----------|---------------|----------------|----------------|---------------------|---------------------|
| <b>Particulars</b>          | <b>Df</b> | <b>Sum Sq</b> | <b>Mean Sq</b> | <b>F value</b> | <b>Pr(&gt;F)</b>    | <b>Significance</b> |
| <b>Treatment</b>            | 3         | 1837.72       | 612.57         | 1035.059       | <b>&lt; 2.2e-16</b> | ***                 |
| <b>Genotype</b>             | 3         | 382.97        | 127.66         | 215.703        | <b>&lt; 2.2e-16</b> | ***                 |
| <b>Treatment : Genotype</b> | 9         | 115.61        | 12.85          | 21.7042        | <b>8.37E-11</b>     | ***                 |

| <b>Response: SOD root</b>   |           |               |                |                |                  |                     |
|-----------------------------|-----------|---------------|----------------|----------------|------------------|---------------------|
| <b>Particulars</b>          | <b>Df</b> | <b>Sum Sq</b> | <b>Mean Sq</b> | <b>F value</b> | <b>Pr(&gt;F)</b> | <b>Significance</b> |
| <b>Treatment</b>            | 3         | 3.6124        | 1.20412        | 54.8828        | <b>2.72E-12</b>  | ***                 |
| <b>Genotype</b>             | 3         | 0.3153        | 0.10511        | 4.7907         | <b>0.00763</b>   | **                  |
| <b>Treatment : Genotype</b> | 9         | 1.1311        | 0.12568        | 5.7285         | <b>0.000127</b>  | ***                 |

| <b>Response: SOD shoot</b>  |           |               |                |                |                     |                     |
|-----------------------------|-----------|---------------|----------------|----------------|---------------------|---------------------|
| <b>Particulars</b>          | <b>Df</b> | <b>Sum Sq</b> | <b>Mean Sq</b> | <b>F value</b> | <b>Pr(&gt;F)</b>    | <b>Significance</b> |
| <b>Treatment</b>            | 3         | 261.465       | 87.155         | 231.1737       | <b>&lt; 2.2e-16</b> | ***                 |
| <b>Genotype</b>             | 3         | 10.265        | 3.422          | 9.0759         | <b>0.000198</b>     | ***                 |
| <b>Treatment : Genotype</b> | 9         | 19.34         | 2.149          | 5.7            | <b>0.000133</b>     | ***                 |

| <b>Response: SPR root</b>   |           |               |                |                |                  |                     |
|-----------------------------|-----------|---------------|----------------|----------------|------------------|---------------------|
| <b>Particulars</b>          | <b>Df</b> | <b>Sum Sq</b> | <b>Mean Sq</b> | <b>F value</b> | <b>Pr(&gt;F)</b> | <b>Significance</b> |
| <b>Treatment</b>            | 3         | 14.79         | 4.9298         | 14.927         | <b>3.97E-06</b>  | ***                 |
| <b>Genotype</b>             | 3         | 8.678         | 2.8926         | 8.7584         | <b>0.000253</b>  | ***                 |
| <b>Treatment : Genotype</b> | 9         | 35.056        | 3.8951         | 11.7939        | <b>1.14E-07</b>  | ***                 |





| Particulars          | Df | Sum Sq | Mean Sq | F value | Pr(>F)          | Significance |
|----------------------|----|--------|---------|---------|-----------------|--------------|
| Treatment            | 3  | 6138.5 | 2046.18 | 45.337  | <b>2.92E-11</b> | ***          |
| Genotype             | 3  | 305.5  | 101.83  | 2.2563  | <b>0.102178</b> |              |
| Treatment : Genotype | 9  | 1461.6 | 162.4   | 3.5983  | <b>0.003851</b> | **           |

| Response: TRL        |    |         |         |         |                 |              |
|----------------------|----|---------|---------|---------|-----------------|--------------|
| Particulars          | Df | Sum Sq  | Mean Sq | F value | Pr(>F)          | Significance |
| Treatment            | 3  | 5617373 | 1872458 | 35.2776 | <b>5.79E-10</b> | ***          |
| Genotype             | 3  | 59063   | 19688   | 0.3709  | <b>0.774532</b> |              |
| Treatment : Genotype | 9  | 966155  | 107351  | 2.0225  | <b>0.071725</b> | .            |

| Response: TRV        |    |        |         |         |                 |              |
|----------------------|----|--------|---------|---------|-----------------|--------------|
| Particulars          | Df | Sum Sq | Mean Sq | F value | Pr(>F)          | Significance |
| Treatment            | 3  | 4.4095 | 1.46984 | 47.693  | <b>1.57E-11</b> | ***          |
| Genotype             | 3  | 0.6398 | 0.21328 | 6.9204  | <b>0.00112</b>  | **           |
| Treatment : Genotype | 9  | 1.6249 | 0.18055 | 5.8584  | <b>0.000106</b> | ***          |

| Response: TSA        |    |        |         |         |                 |              |
|----------------------|----|--------|---------|---------|-----------------|--------------|
| Particulars          | Df | Sum Sq | Mean Sq | F value | Pr(>F)          | Significance |
| Treatment            | 3  | 60585  | 20195   | 45.3369 | <b>2.92E-11</b> | ***          |
| Genotype             | 3  | 3015   | 1005    | 2.2563  | <b>0.102178</b> |              |
| Treatment : Genotype | 9  | 14425  | 1602.8  | 3.5983  | <b>0.003851</b> | **           |

| Response: TSRL       |    |          |          |         |                 |              |
|----------------------|----|----------|----------|---------|-----------------|--------------|
| Particulars          | Df | Sum Sq   | Mean Sq  | F value | Pr(>F)          | Significance |
| Treatment            | 3  | 8.42E+08 | 2.81E+08 | 12.5576 | <b>1.72E-05</b> | ***          |
| Genotype             | 3  | 1.16E+08 | 38817409 | 1.7371  | <b>0.180571</b> |              |
| Treatment : Genotype | 9  | 8.09E+08 | 89903964 | 4.0232  | <b>0.001851</b> | **           |

| <b>Response: TSRSA</b>      |           |               |                |                |                  |                     |
|-----------------------------|-----------|---------------|----------------|----------------|------------------|---------------------|
| <b>Particulars</b>          | <b>Df</b> | <b>Sum Sq</b> | <b>Mean Sq</b> | <b>F value</b> | <b>Pr(&gt;F)</b> | <b>Significance</b> |
| <b>Treatment</b>            | 3         | 9261856       | 3087285        | 12.0799        | <b>2.35E-05</b>  | ***                 |
| <b>Genotype</b>             | 3         | 2702722       | 900907         | 3.5251         | <b>0.026699</b>  | *                   |
| <b>Treatment : Genotype</b> | 9         | 11506097      | 1278455        | 5.0023         | <b>0.000379</b>  | ***                 |

| <b>Response: TSRW_LB</b>    |           |               |                |                |                  |                     |
|-----------------------------|-----------|---------------|----------------|----------------|------------------|---------------------|
| <b>Particulars</b>          | <b>Df</b> | <b>Sum Sq</b> | <b>Mean Sq</b> | <b>F value</b> | <b>Pr(&gt;F)</b> | <b>Significance</b> |
| <b>Treatment</b>            | 3         | 4.46E-14      | 1.49E-14       | 15.5627        | <b>2.74E-06</b>  | ***                 |
| <b>Genotype</b>             | 3         | 1.45E-14      | 4.84E-15       | 5.0733         | <b>0.005838</b>  | **                  |
| <b>Treatment : Genotype</b> | 9         | 3.99E-14      | 4.43E-15       | 4.6398         | <b>0.000671</b>  | ***                 |

| <b>Response: TSRW_SAB</b>   |           |               |                |                |                  |                     |
|-----------------------------|-----------|---------------|----------------|----------------|------------------|---------------------|
| <b>Particulars</b>          | <b>Df</b> | <b>Sum Sq</b> | <b>Mean Sq</b> | <b>F value</b> | <b>Pr(&gt;F)</b> | <b>Significance</b> |
| <b>Treatment</b>            | 3         | 2.42E-12      | 8.06E-13       | 15.5509        | <b>2.76E-06</b>  | ***                 |
| <b>Genotype</b>             | 3         | 1.60E-12      | 5.32E-13       | 10.2681        | <b>8.20E-05</b>  | ***                 |
| <b>Treatment : Genotype</b> | 9         | 2.63E-12      | 2.92E-13       | 5.6352         | <b>0.000146</b>  | ***                 |

| <b>Response: WD</b>         |           |               |                |                |                  |                     |
|-----------------------------|-----------|---------------|----------------|----------------|------------------|---------------------|
| <b>Particulars</b>          | <b>Df</b> | <b>Sum Sq</b> | <b>Mean Sq</b> | <b>F value</b> | <b>Pr(&gt;F)</b> | <b>Significance</b> |
| <b>Treatment</b>            | 3         | 407.49        | 135.829        | 3.7325         | <b>0.02161</b>   | *                   |
| <b>Genotype</b>             | 3         | 77.24         | 25.748         | 0.7075         | <b>0.55508</b>   |                     |
| <b>Treatment : Genotype</b> | 9         | 458.7         | 50.966         | 1.4005         | <b>0.23188</b>   |                     |

| <b>Response:</b>                |           |               |                |                |                  |                     |
|---------------------------------|-----------|---------------|----------------|----------------|------------------|---------------------|
| <b>Particulars</b>              | <b>Df</b> | <b>Sum Sq</b> | <b>Mean Sq</b> | <b>F value</b> | <b>Pr(&gt;F)</b> | <b>Significance</b> |
| <b>Treatment</b>                |           |               |                |                |                  |                     |
| <b>Genotype</b>                 |           |               |                |                |                  |                     |
| <b>Treatment :<br/>Genotype</b> |           |               |                |                |                  |                     |
